# Supplementary material
Source: Elsevier journal article supplement (https://www.sciencedirect.com/science/article/pii/S2603647919300041)
Supplement: mmc1 [file S2603647919300041:mmc1.docx]

**Attachment A. Research strategy**

First research (conducted until February 06, 2017)

MEDLINE (PUBMED)

((((((((((((((((((("managed networks"[Title/Abstract]) OR "managed network"[Title/Abstract]) OR "network governance"[Title/Abstract]) OR "organizational networks"[Title/Abstract]) OR "organizational network"[Title/Abstract]) OR "complex interventions"[Title/Abstract]) OR "complex intervention"[Title/Abstract]) OR "integrated health care"[Title/Abstract]) OR "services network"[Title/Abstract]) OR "services networks"[Title/Abstract]) OR "multidisciplinary teams"[Title/Abstract]) OR "multidisciplinary team"[Title/Abstract]) OR "health network"[Title/Abstract]) OR "health networks"[Title/Abstract]) OR "clinical network"[Title/Abstract]) OR "clinical networks"[Title/Abstract])) AND ((((((((((("patient* experience"[Title/Abstract] OR "patient* satisfaction"[Title/Abstract]) OR "outcome"[Title/Abstract]) OR "costs"[Title/Abstract]) OR "efficiency"[Title/Abstract]) OR "effectiveness"[Title/Abstract]) OR "healthcare worker* satisfaction"[Title/Abstract]) OR "job satisfaction"[Title/Abstract]) OR "burnout"[Title/Abstract]) OR "appropriate care"[Title/Abstract]) OR "appropriateness"[Title/Abstract]))) AND ("0001/01/01"[PDAT] : "2017/02/06"[PDAT]))

EMBASE

**#1** "managed networks":ab,ti OR "managed network":ab,ti OR "network governance":ab,ti OR "organizational networks":ab,ti OR "organizational network":ab,ti OR "complex interventions":ab,ti OR "complex intervention":ab,ti OR "integrated health care":ab,ti OR "services network":ab,ti OR "services networks":ab,ti OR "multidisciplinary teams":ab,ti OR "multidisciplinary team":ab,ti OR "health network":ab,ti OR "health networks":ab,ti OR "clinical network":ab,ti OR "clinical networks":ab,ti

**#2** "patient* experience":ab,ti OR "patient* satisfaction":ab,ti OR "outcome":ab,ti OR "costs":ab,ti OR "efficiency":ab,ti OR "effectiveness":ab,ti OR "healthcare worker* satisfaction":ab,ti OR "burnout":ab,ti OR "appropriate care":ab,ti OR "appropriateness":ab,ti OR "job satisfaction":ab,ti

**#3** #1 AND #2

CINAHL

**S1**  TI "managed networks" OR AB "managed networks"

**S2** TI "managed network" OR AB "managed network"

**S3** TI "network governance" OR AB "network governance"

**S4** TI "organizational networks" OR AB "organizational networks"

**S5**  TI "organizational network" OR AB "organizational network"

**S6**  TI "complex interventions" OR AB "complex interventions"

**S7** TI "complex intervention" OR AB "complex intervention"

**S8**  TI "integrated health care" OR AB "integrated health care"

**S9** TI "services network" OR AB "services network"

**S10** TI "services networks" OR AB "services networks"

**S11** TI "multidisciplinary teams" OR AB "multidisciplinary teams"

**S12** TI "multidisciplinary team" OR AB "multidisciplinary team"

**S13** TI "health network" OR AB "health network"

**S14** TI "health networks" OR AB "health networks"

**S15** TI "clinical network" OR AB "clinical network"

**S16** TI "clinical networks" OR AB "clinical networks"

**S17** S1 OR S2 OR S3 OR S4 OR S5 OR S6 OR S7 OR S8 OR S9 OR S10 OR S11 OR S12 OR S13 OR S14 OR S15 OR S16

**S18** TI "patient* experience" OR AB "patient* experience"

**S19** TI "patient* satisfaction" OR AB "patient* satisfaction"

**S20** TI "outcome" OR AB "outcome"

**S21** TI "costs" OR AB "costs"

**S22** TI "efficiency" OR AB "efficiency"

**S23** TI "effectiveness" OR AB "effectiveness"

**S24** TI "healthcare worker* satisfaction" OR AB "healthcare worker* satisfaction"

**S25** TI "job satisfaction" OR AB "job satisfaction"

**S26** TI "burnout" OR AB "burnout"

**S27** TI "appropriate care" OR AB "appropriate care"

**S28** TI "appropriateness" OR AB "appropriateness"

**S29** S18 OR S19 OR S20 OR S21 OR S22 OR S23 OR S24 OR S25 OR S26 OR S27 OR S28

**S30** S17 AND S29

Update research (conducted from February 07, 2017 to February 28, 2018)

MEDLINE (PUBMED)

((((((((((((((((((("managed networks"[Title/Abstract]) OR "managed network"[Title/Abstract]) OR "network governance"[Title/Abstract]) OR "organizational networks"[Title/Abstract]) OR "organizational network"[Title/Abstract]) OR "complex interventions"[Title/Abstract]) OR "complex intervention"[Title/Abstract]) OR "integrated health care"[Title/Abstract]) OR "services network"[Title/Abstract]) OR "services networks"[Title/Abstract]) OR "multidisciplinary teams"[Title/Abstract]) OR "multidisciplinary team"[Title/Abstract]) OR "health network"[Title/Abstract]) OR "health networks"[Title/Abstract]) OR "clinical network"[Title/Abstract]) OR "clinical networks"[Title/Abstract])) AND ((((((((((("patient* experience"[Title/Abstract] OR "patient* satisfaction"[Title/Abstract]) OR "outcome"[Title/Abstract]) OR "costs"[Title/Abstract]) OR "efficiency"[Title/Abstract]) OR "effectiveness"[Title/Abstract]) OR "healthcare worker* satisfaction"[Title/Abstract]) OR "job satisfaction"[Title/Abstract]) OR "burnout"[Title/Abstract]) OR "appropriate care"[Title/Abstract]) OR "appropriateness"[Title/Abstract]))) AND ("2017/02/07"[PDAT] : "2018/02/28"[PDAT]))

EMBASE

**#1** ('managed networks':ab,ti OR 'managed network':ab,ti OR 'network governance':ab,ti OR 'organizational networks':ab,ti OR 'organizational network':ab,ti OR 'complex interventions':ab,ti OR 'complex intervention':ab,ti OR 'integrated health care':ab,ti OR 'services network':ab,ti OR 'services networks':ab,ti OR 'multidisciplinary teams':ab,ti OR 'multidisciplinary team':ab,ti OR 'health network':ab,ti OR 'health networks':ab,ti OR 'clinical network':ab,ti OR 'clinical networks':ab,ti) AND [7-2-2017]/sd NOT [28-2-2018]/sd

**#2** ('patient* experience':ab,ti OR 'patient* satisfaction':ab,ti OR 'outcome':ab,ti OR 'costs':ab,ti OR 'efficiency':ab,ti OR 'effectiveness':ab,ti OR 'healthcare worker* satisfaction':ab,ti OR 'burnout':ab,ti OR 'appropriate care':ab,ti OR 'appropriateness':ab,ti OR 'job satisfaction':ab,ti) AND [7-2-2017]/sd NOT [28-2-2018]/sd

**#3 #1** AND **#2**

CINAHL

Time limits – Publication date: 2017.02.07 – 2018.02.28

**S1**  TI "managed networks" OR AB "managed networks"

**S2** TI "managed network" OR AB "managed network"

**S3** TI "network governance" OR AB "network governance"

**S4** TI "organizational networks" OR AB "organizational networks"

**S5**  TI "organizational network" OR AB "organizational network"

**S6**  TI "complex interventions" OR AB "complex interventions"

**S7** TI "complex intervention" OR AB "complex intervention"

**S8**  TI "integrated health care" OR AB "integrated health care"

**S9** TI "services network" OR AB "services network"

**S10** TI "services networks" OR AB "services networks"

**S11** TI "multidisciplinary teams" OR AB "multidisciplinary teams"

**S12** TI "multidisciplinary team" OR AB "multidisciplinary team"

**S13** TI "health network" OR AB "health network"

**S14** TI "health networks" OR AB "health networks"

**S15** TI "clinical network" OR AB "clinical network"

**S16** TI "clinical networks" OR AB "clinical networks"

**S17** S1 OR S2 OR S3 OR S4 OR S5 OR S6 OR S7 OR S8 OR S9 OR S10 OR S11 OR S12 OR S13 OR S14 OR S15 OR S16

**S18** TI "patient* experience" OR AB "patient* experience"

**S19** TI "patient* satisfaction" OR AB "patient* satisfaction"

**S20** TI "outcome" OR AB "outcome"

**S21** TI "costs" OR AB "costs"

**S22** TI "efficiency" OR AB "efficiency"

**S23** TI "effectiveness" OR AB "effectiveness"

**S24** TI "healthcare worker* satisfaction" OR AB "healthcare worker* satisfaction"

**S25** TI "job satisfaction" OR AB "job satisfaction"

**S26** TI "burnout" OR AB "burnout"

**S27** TI "appropriate care" OR AB "appropriate care"

**S28** TI "appropriateness" OR AB "appropriateness"

**S29** S18 OR S19 OR S20 OR S21 OR S22 OR S23 OR S24 OR S25 OR S26 OR S27 OR S28

**S30** S17 AND S29
